# Supplementary material for: Differential gene body methylation and reduced expression of cell adhesion and neurotransmitter receptor genes in adverse maternal environment
Source: PubMed Central journal article supplement — Transl Psychiatry. 2013 Jan 22;3(1):e218–. doi: 10.1038/tp.2012.130 (PMC3566713; doi:10.1038/tp.2012.130), 2013-01-22
Supplement: tp2012130x1.pdf [file tp2012130x1.pdf]

# *Atbf1*

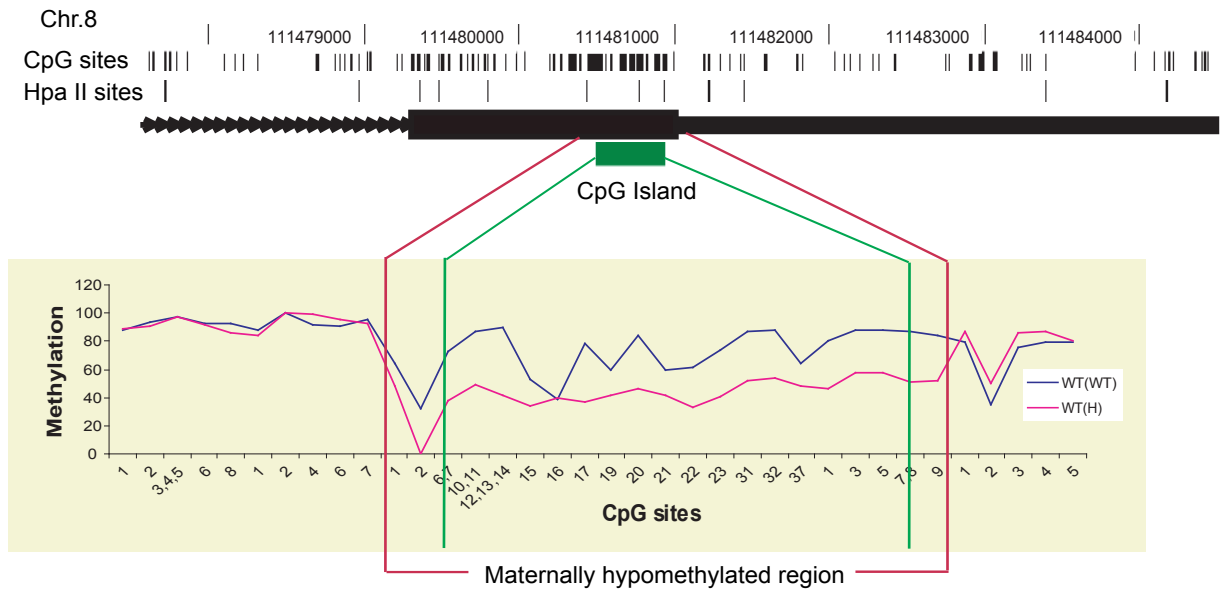

# *Smo*

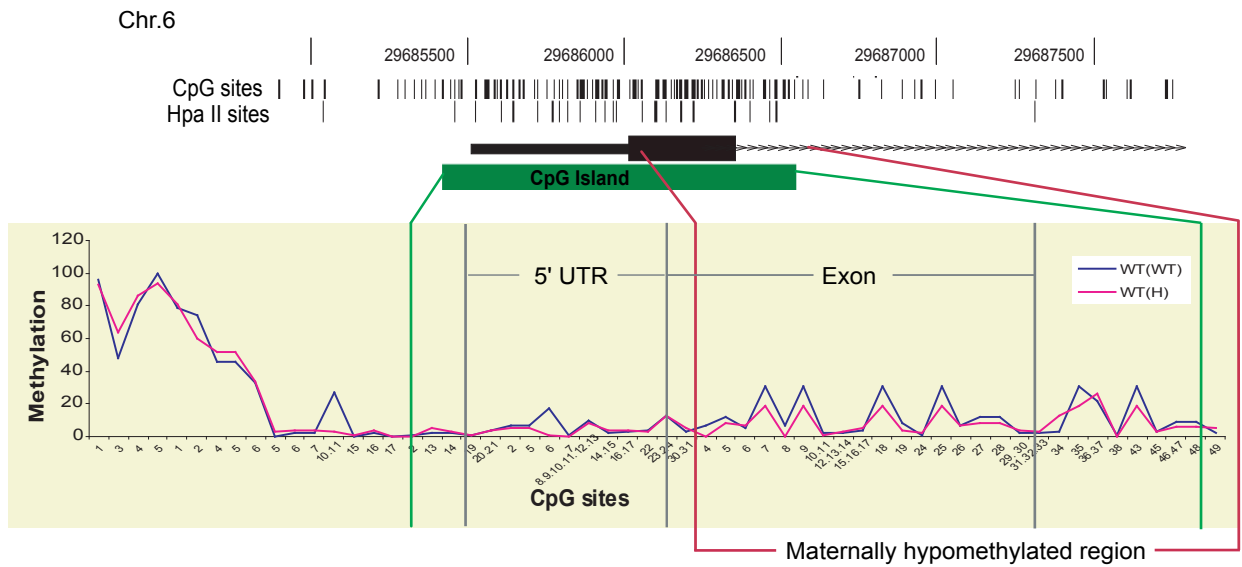

**Supplemental Figure 1.** Differential methylation is restricted to CpG islands in the *Atbf1* and *Smo* DMRs.
