# Supplementary material for: Differential gene body methylation and reduced expression of cell adhesion and neurotransmitter receptor genes in adverse maternal environment
Source: PubMed Central journal article supplement — Transl Psychiatry. 2013 Jan 22;3(1):e218–. doi: 10.1038/tp.2012.130 (PMC3566713; doi:10.1038/tp.2012.130), 2013-01-22
Supplement: tp2012130x2.pdf [file tp2012130x2.pdf]

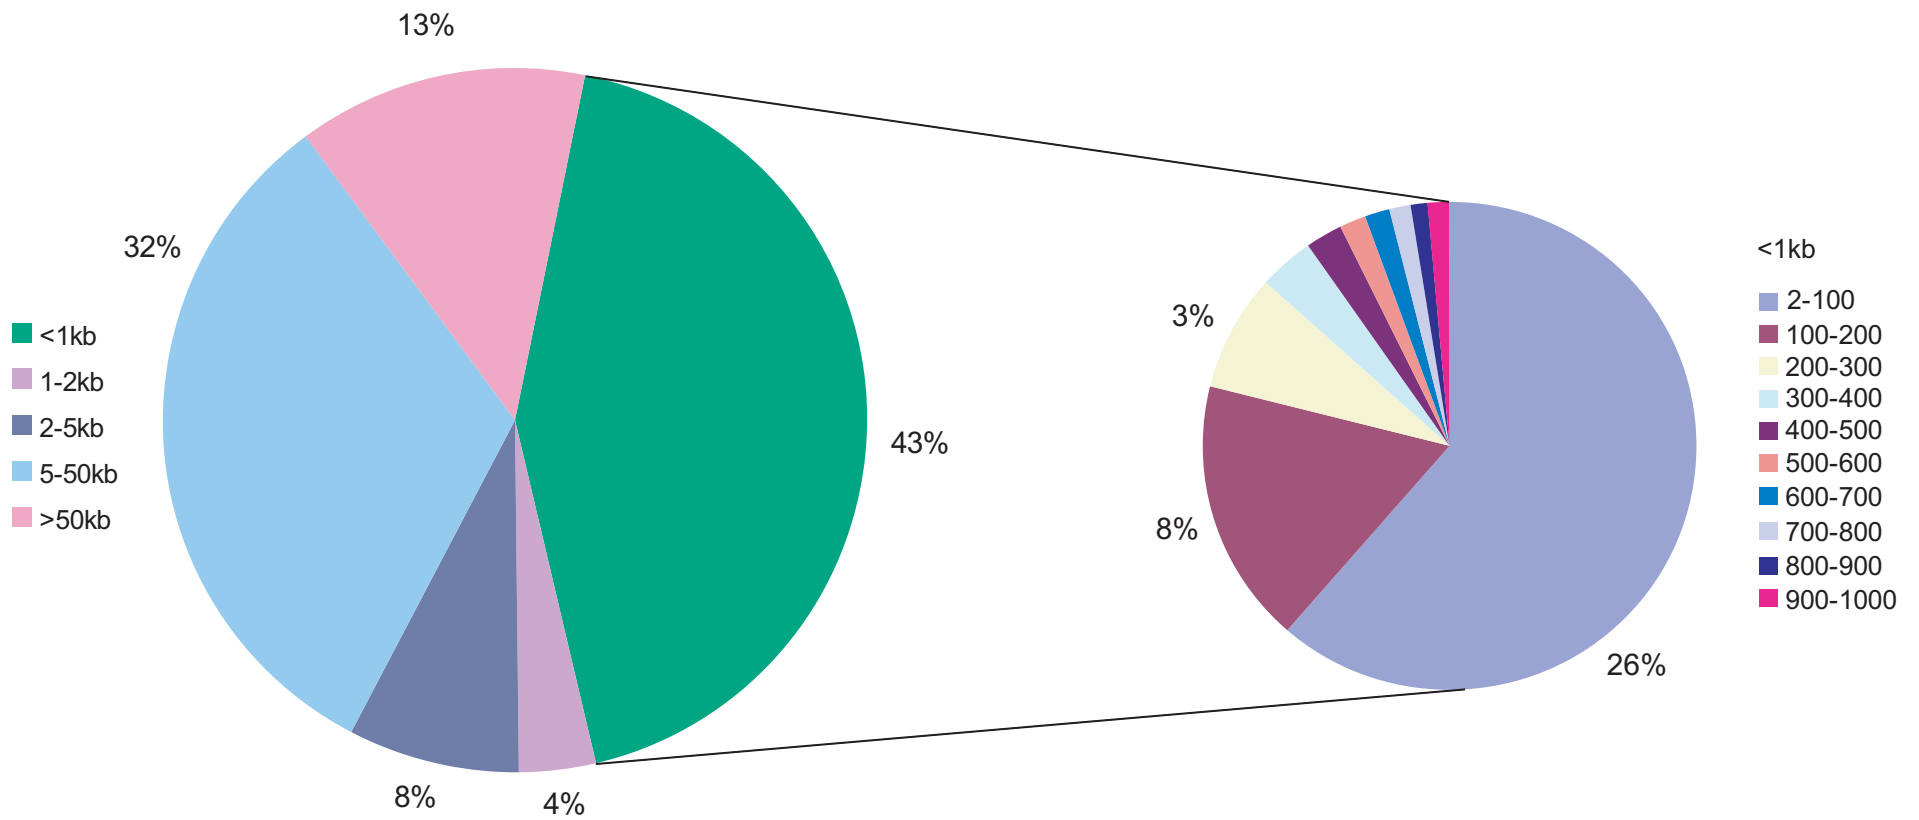

**Supplemental Figure 2.** Distribution of DMSs based on their inter-DMS distance indicates clustering (e.g. over 50% of DMSs are closer than 5 kb). DMSs with an inter-DMS distance of <1kb are further dissected showing that overall, 26% of DMSs are closer than 100 bp to each other.
