# Supplementary material for: Differential gene body methylation and reduced expression of cell adhesion and neurotransmitter receptor genes in adverse maternal environment
Source: PubMed Central journal article supplement — Transl Psychiatry. 2013 Jan 22;3(1):e218–. doi: 10.1038/tp.2012.130 (PMC3566713; doi:10.1038/tp.2012.130), 2013-01-22
Supplement: tp2012130x4.pdf [file tp2012130x4.pdf]

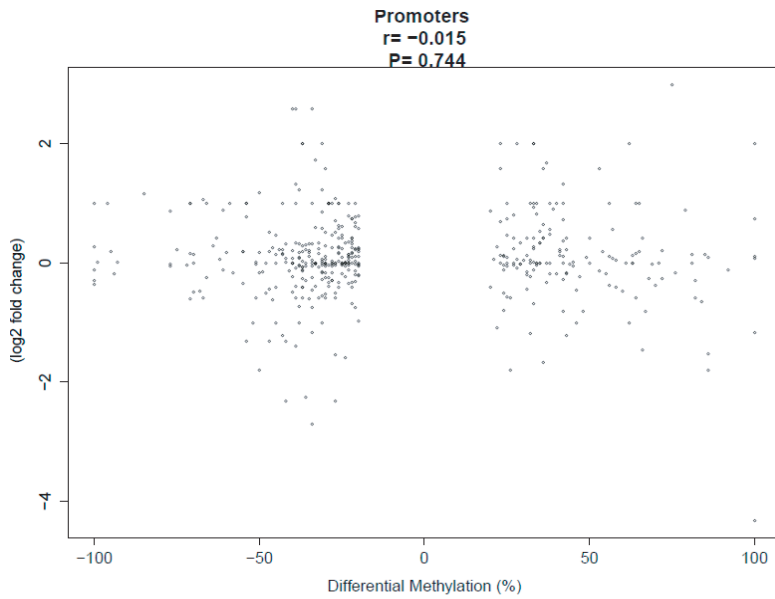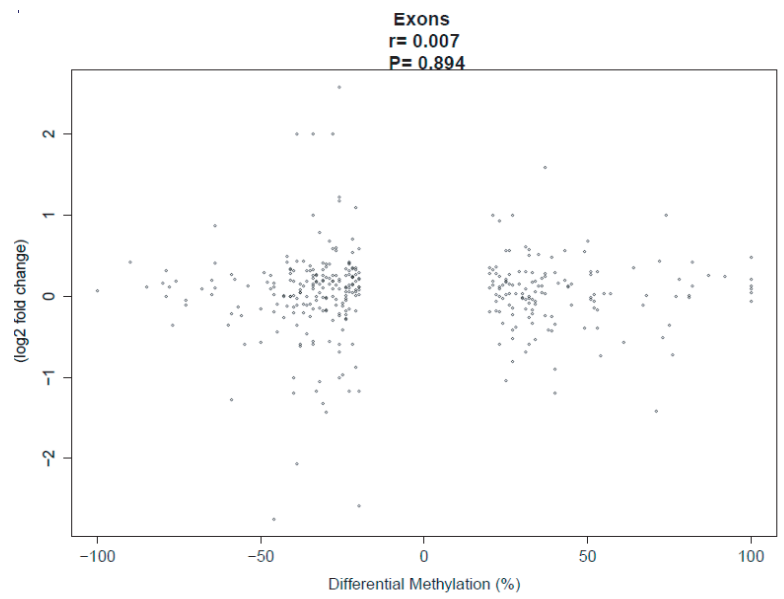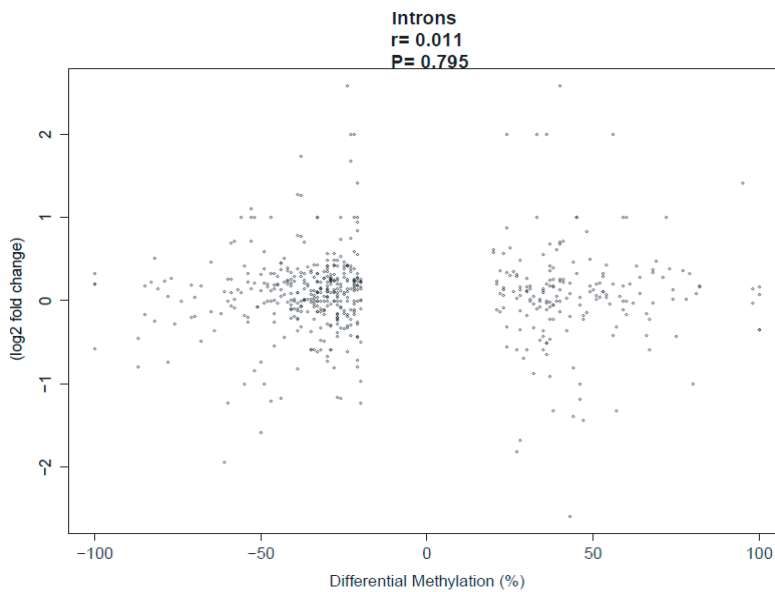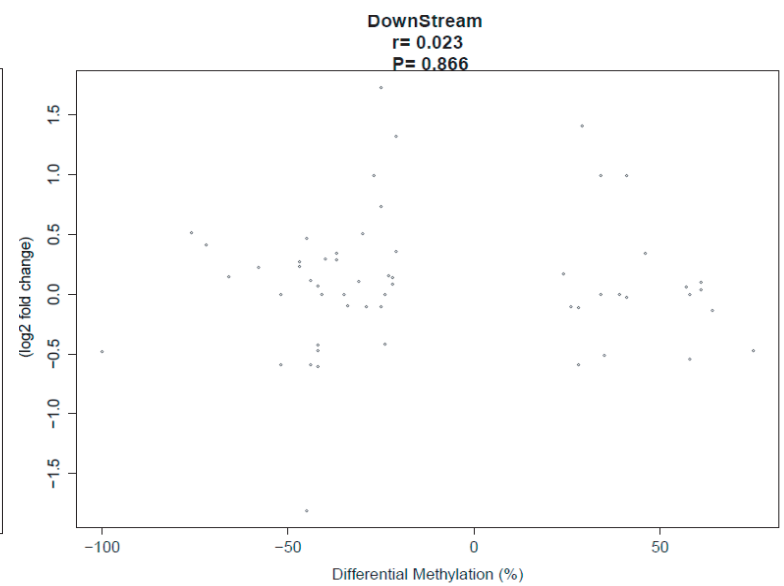

**Supplemental Figure 4.** No apparent correlation between changes in CpG methylation and gene expression (WT(WT)-WT(H)) at genes containing DMRs (Pearson's correlation).
